# Supplementary material for: Methane Seep Carbonates Host Distinct, Diverse, and Dynamic Microbial Assemblages
Source: PubMed Central journal article supplement — mBio. 2015 Dec 22;6(6):e01348-15. doi: 10.1128/mBio.01348-15 (PMC4701829; doi:10.1128/mbio.01348-15), 2015-12-22

### (A) Native Characterization

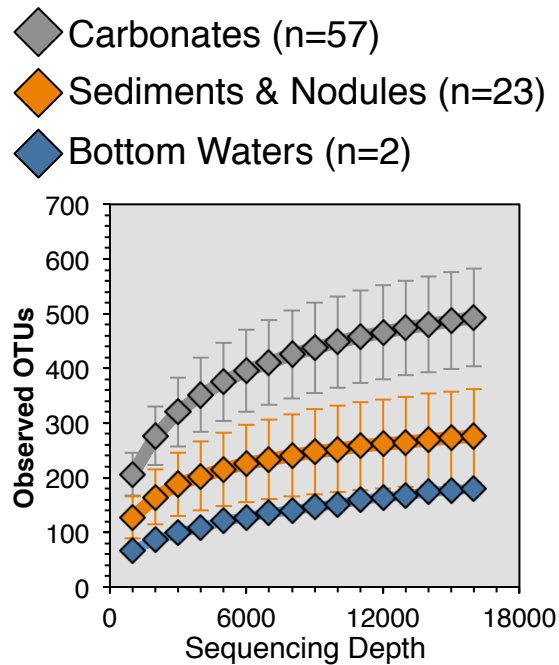

### (B) Carbonate Transplantation & Colonization

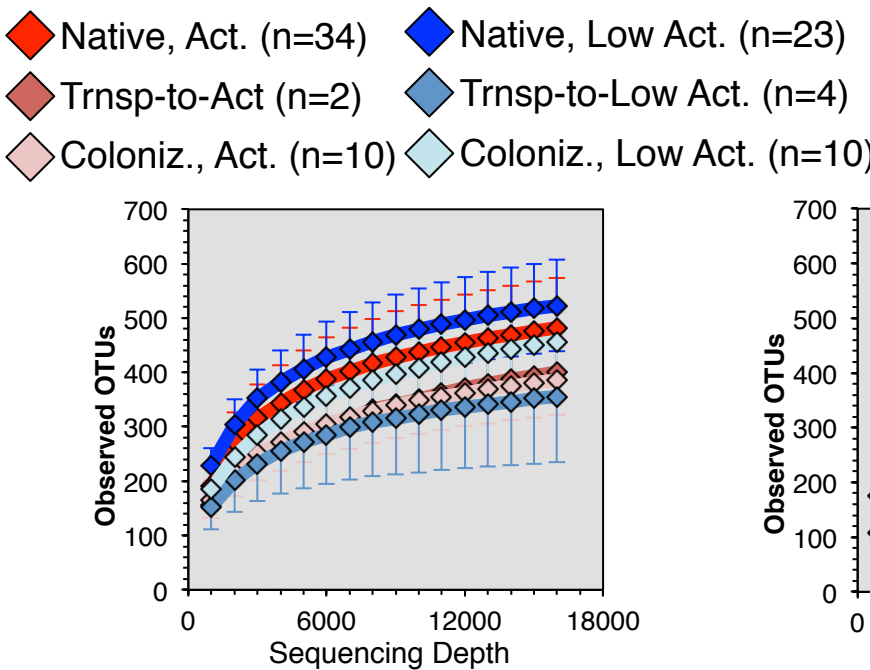

### (C) Carbonate & Wood Colonization

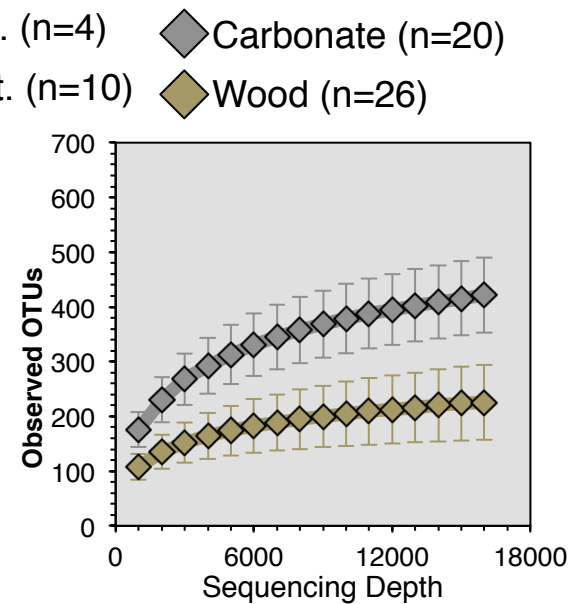

### (D)

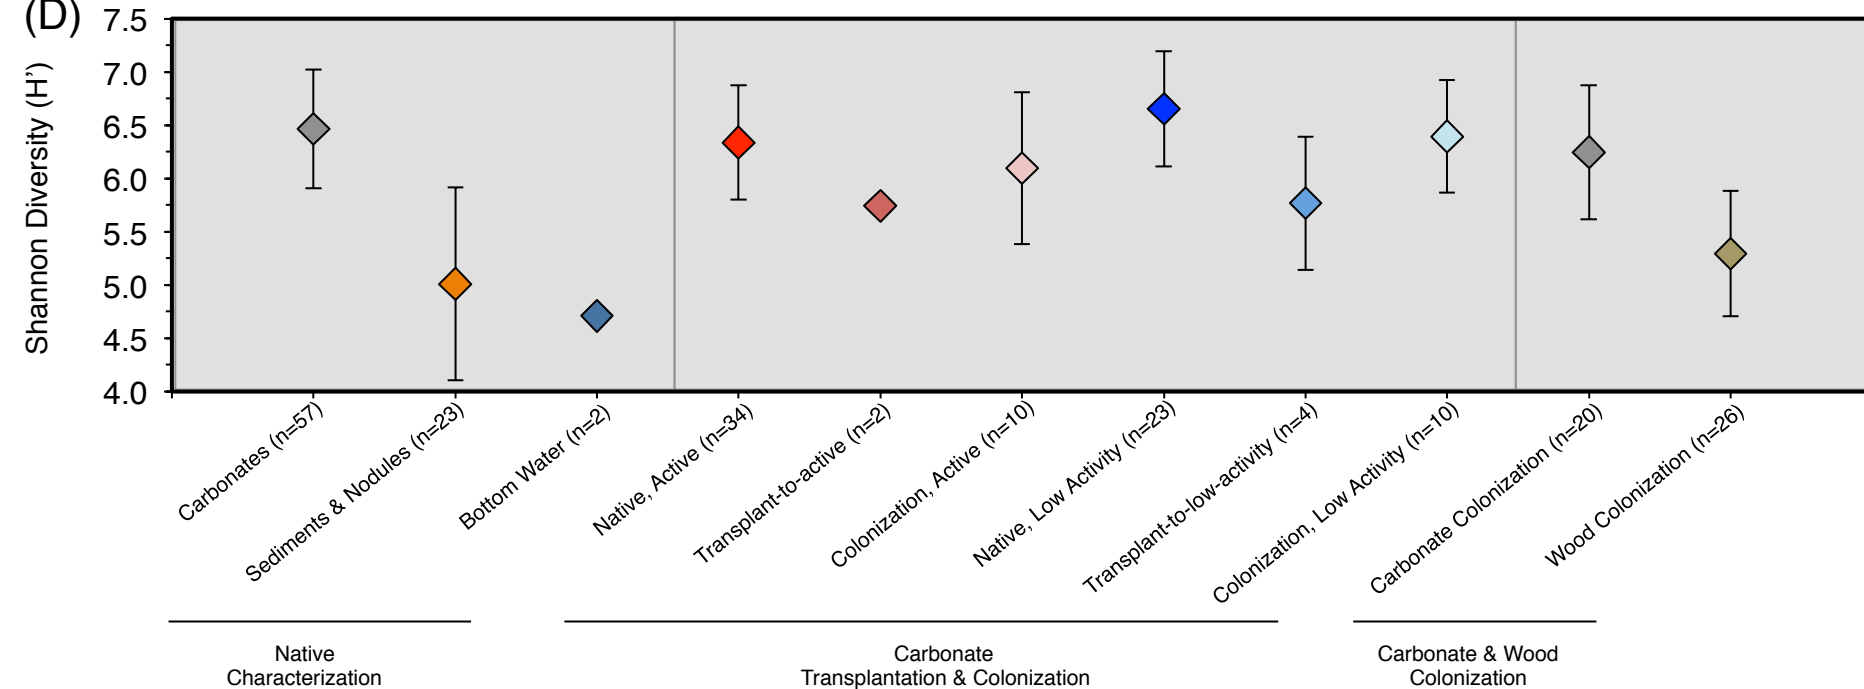

Supplement: mbo006152587sf2.pdf [file mbo006152587sf2.pdf]
