# Supplementary material for: Methane Seep Carbonates Host Distinct, Diverse, and Dynamic Microbial Assemblages
Source: PubMed Central journal article supplement — mBio. 2015 Dec 22;6(6):e01348-15. doi: 10.1128/mBio.01348-15 (PMC4701829; doi:10.1128/mbio.01348-15), 2015-12-22
Supplement: mbo006152587sf4.pdf [file mbo006152587sf4.pdf]

**(A)** Low Activity Sites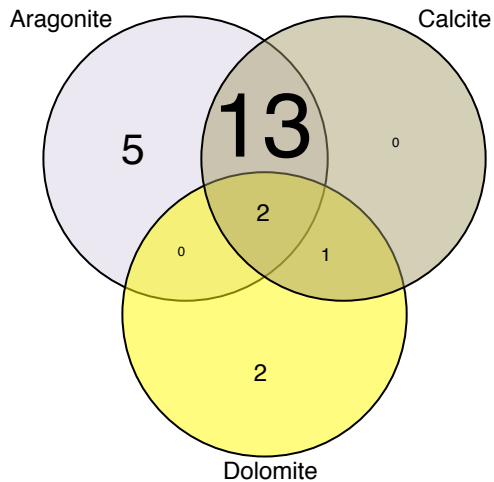**(B)** Active Sites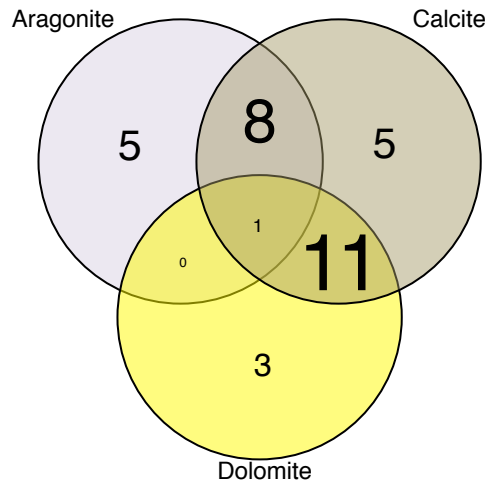**(C)**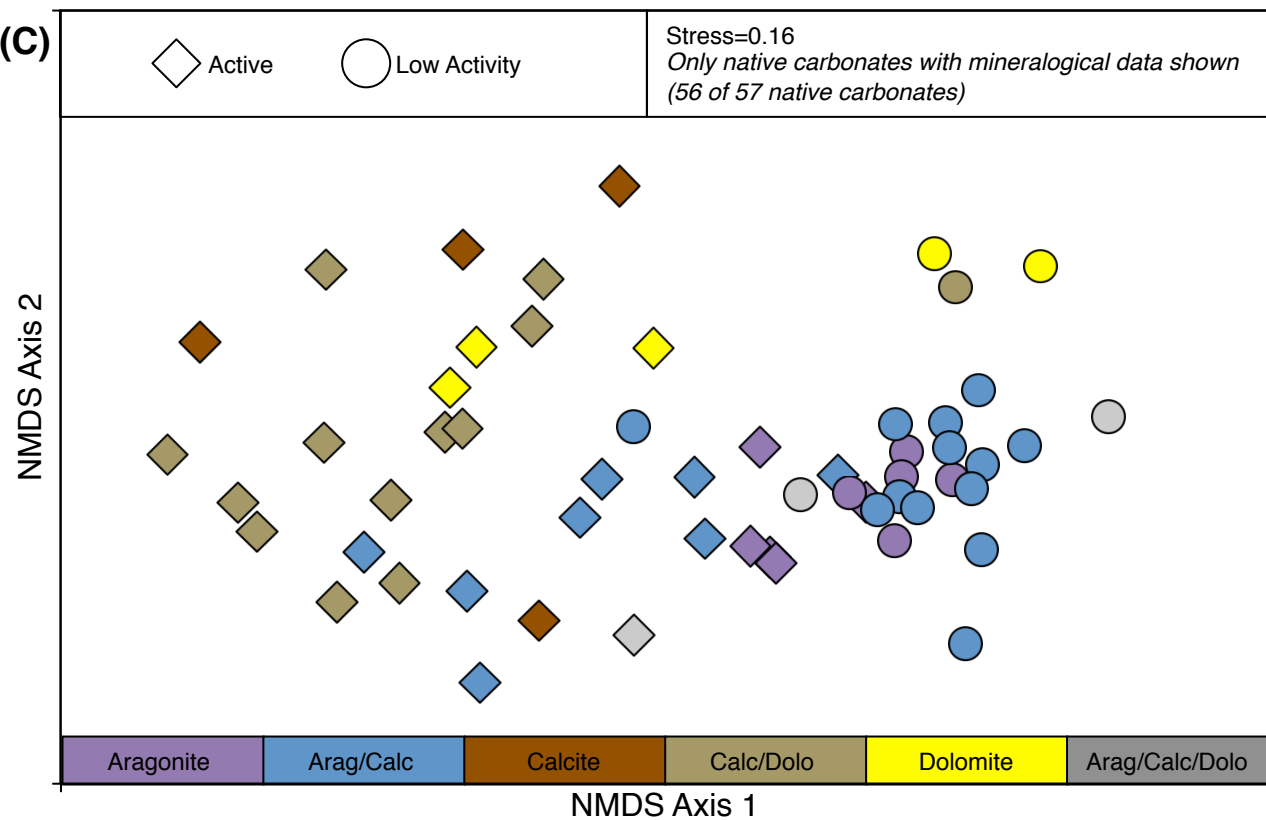

- ◆ Aragonite\_Active (n=5)
- ◆ Aragonite/Calcite\_Active (n=8)
- ◆ Calcite\_Active (n=4)
- ◆ Calcite/Dolomite\_Active (n=12)
- ◆ Dolomite\_Active (n=3)
- ◆ Aragonite/Calcite/Dolomite\_Active (n=1)
- Aragonite\_LowActivity (n=5)
- Aragonite/Calcite\_LowActivity (n=13)
- Calcite/Dolomite\_LowActivity (n=1)
- Dolomite\_LowActivity (n=2)
- Aragonite/Calcite/Dolomite\_LowActivity (n=2)
