# Supplementary figures and images for: Methane Seep Carbonates Host Distinct, Diverse, and Dynamic Microbial Assemblages
Source: PubMed Central journal article supplement — mBio. 2015 Dec 22;6(6):e01348-15. doi: 10.1128/mBio.01348-15 (PMC4701829; doi:10.1128/mbio.01348-15), 2015-12-22

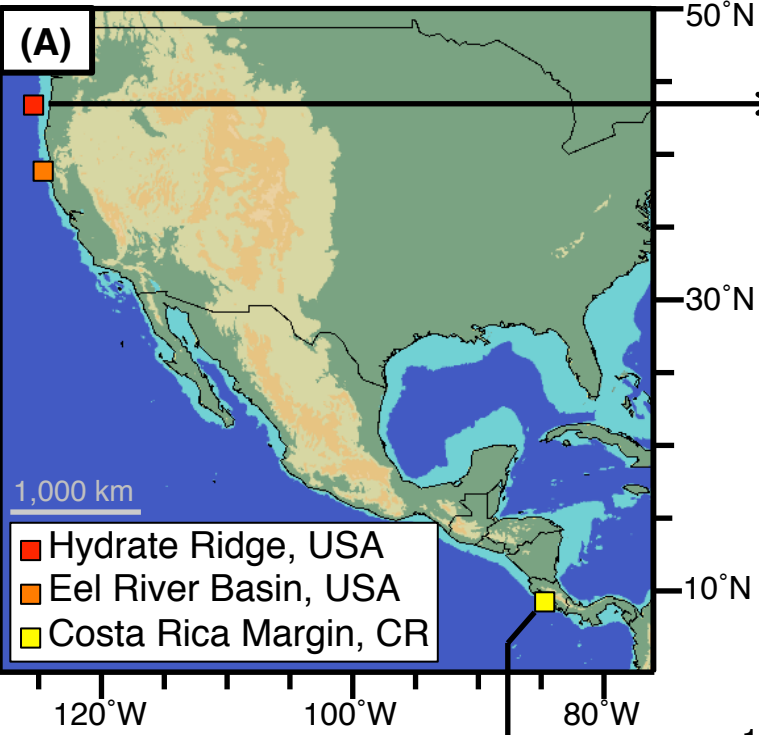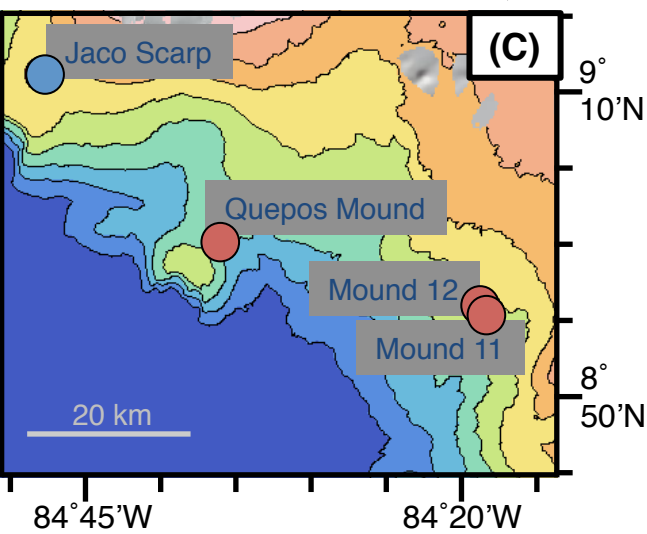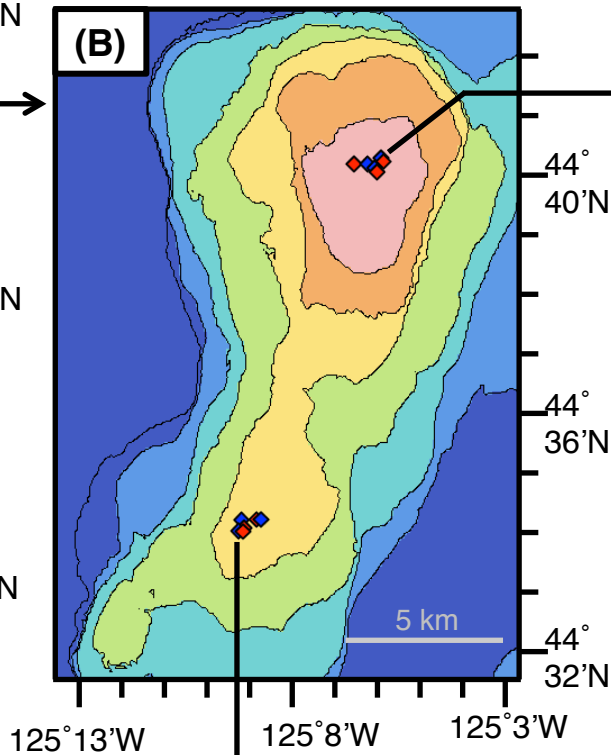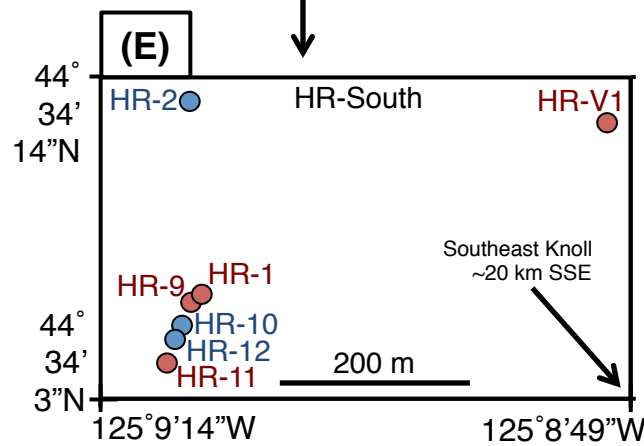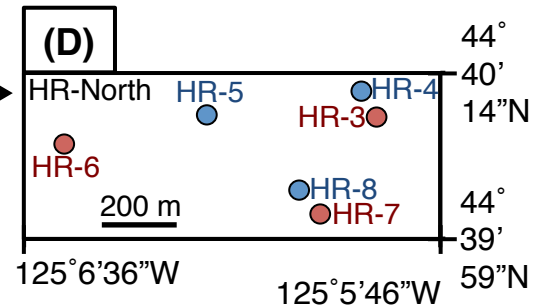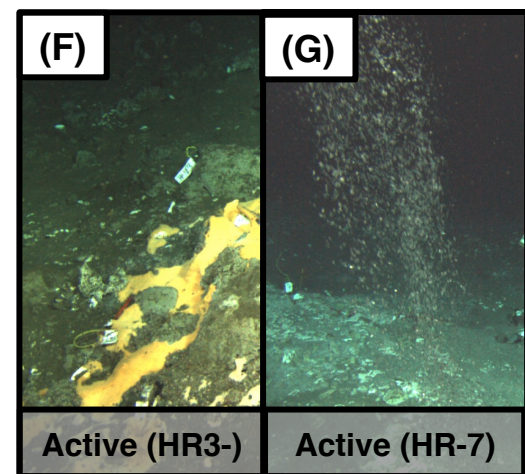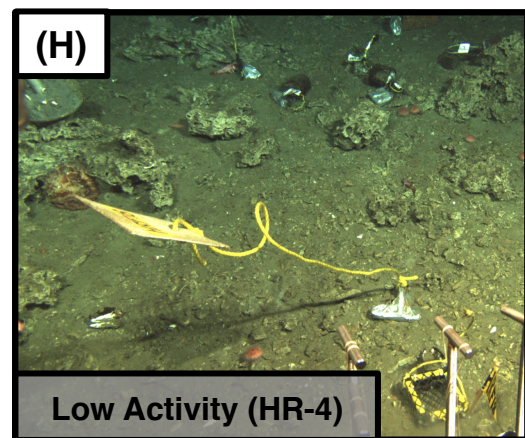

Supplement: mbo006152587sf1.pdf [file mbo006152587sf1.pdf]

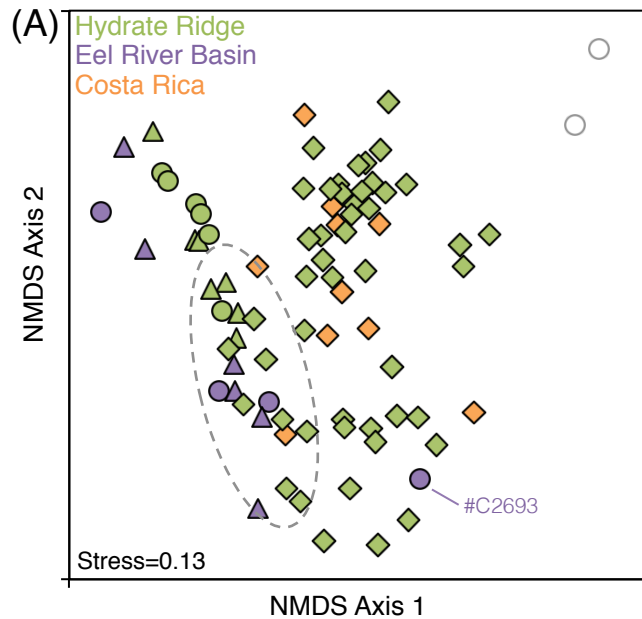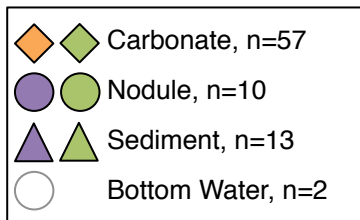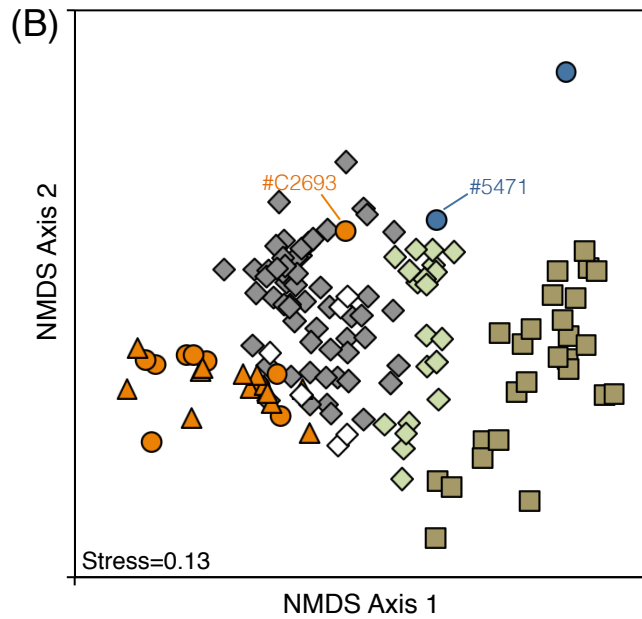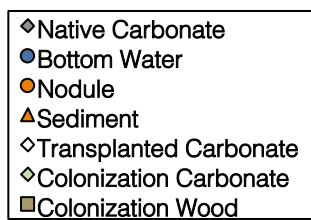

Supplement: mbo006152587sf3.pdf [file mbo006152587sf3.pdf]

Bray-Curtis Similarity

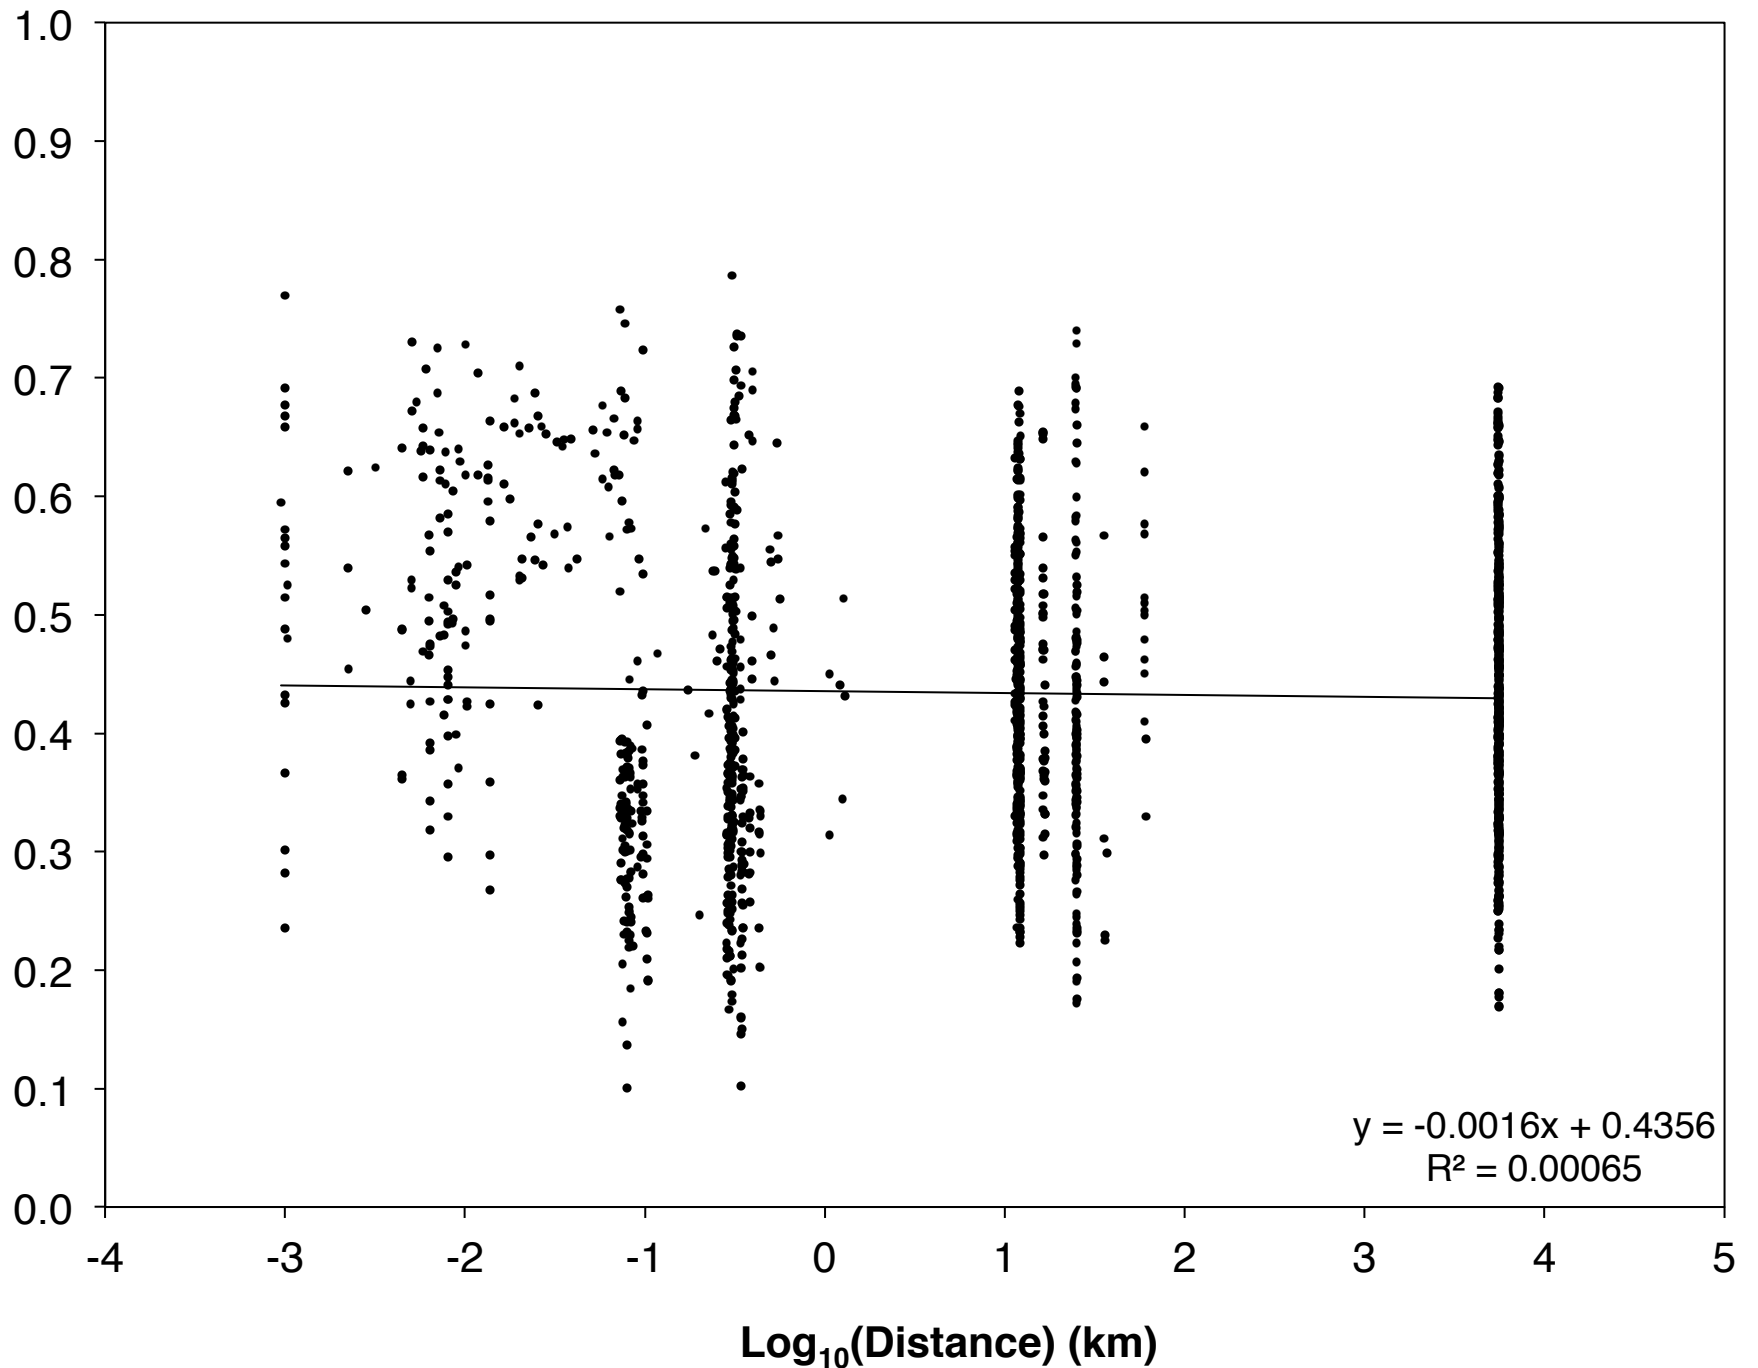

$y = -0.0016x + 0.4356$   
 $R^2 = 0.00065$

Supplement: mbo006152587sf5.pdf [file mbo006152587sf5.pdf]

Bottom Water  
5472, 5471

Wood  
Colonization  
5191, 5310

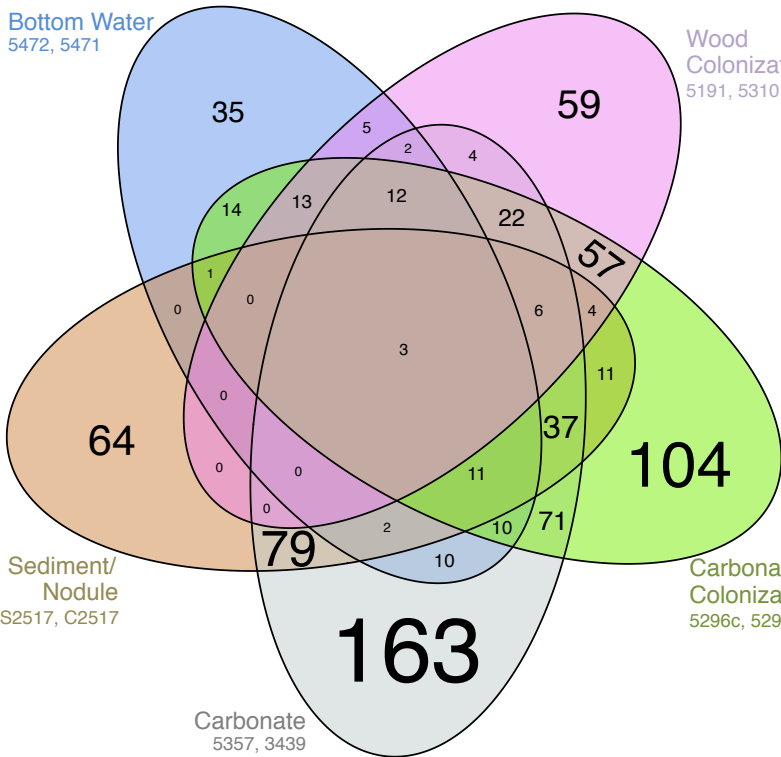

Sediment/  
Nodule  
S2517, C2517

Carbonate  
Colonization  
5296c, 5296d

Carbonate  
5357, 3439

Supplement: mbo006152587sf6.pdf [file mbo006152587sf6.pdf]
